# Supplementary material for: Antioxidant and anti-aging potential of a peptide formulation (Gal2–Pep) conjugated with gallic acid
Source: Royal Society of Chemistry journal article supplement (doi:10.1039/d1ra03421a), 2021-01-01
Supplement: d1ra03421a1.pdf [file d1ra03421a1.pdf]

## Supplementary Information

### **Antioxidant and anti-aging potential of a peptide formulation (Gal2-Pep) conjugated with gallic acid**

Hoomin Lee<sup>a,§</sup>, Kwanwoo Kim<sup>a,§</sup>, Cheolwoo Oh<sup>a</sup>, Chi-Hu Park<sup>b</sup>, Sheik Aliya<sup>a</sup>, Hyoungh Shik Kim<sup>b</sup>, Vivek K. Bajpai<sup>c,\*</sup>, Yun Suk Huh<sup>a,\*</sup>

<sup>a</sup> Department of Biological Sciences and Bioengineering, Nano Bio High-Tech Materials Research Center, Inha University, Incheon 22212, Republic of Korea

<sup>b</sup> Natural Bioactive & Anticancer Research Institute, YEPBio Co., Ltd., Suwon 16229, Republic of Korea

<sup>c</sup> Department of Energy and Materials Engineering, Dongguk University, 30 Pildong-ro 1-gil, Seoul 04620, Republic of Korea

§ These authors contributed equally to this work.

**Running head:** Biologically active peptide formulation

**Corresponding author:**

vbitech04@gmail.com (V. K. Bajpai); [yunsuk.huh@inha.ac.kr](mailto:yunsuk.huh@inha.ac.kr) (Y. S. Huh)

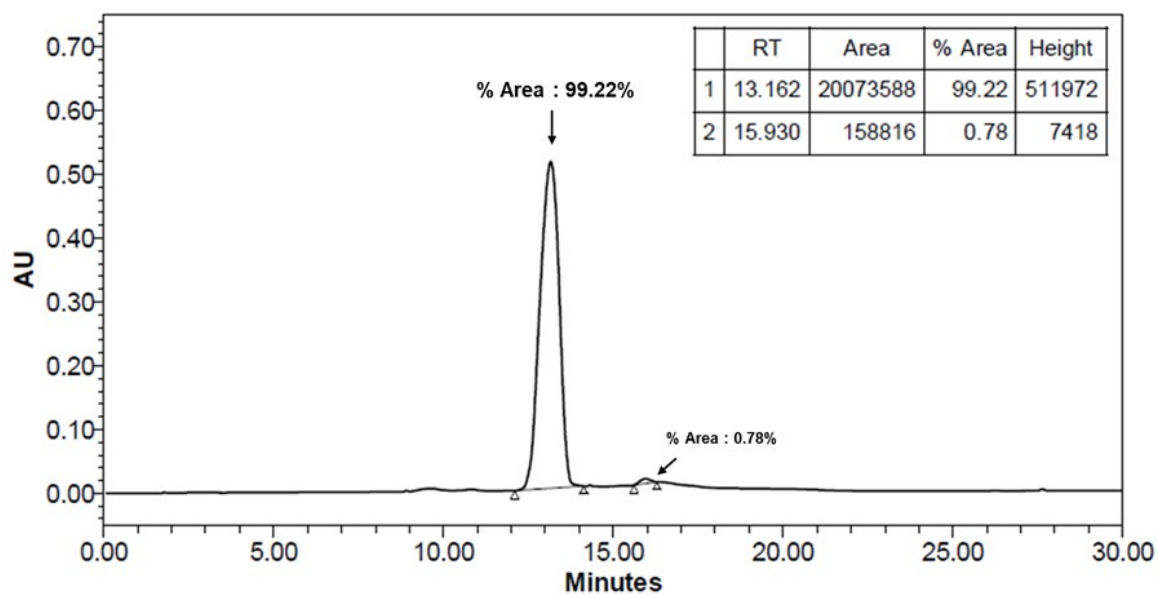

Figure S1. HPLC peak of purified (Galloyl)<sub>2</sub>-KTPPTTP. Analytical reverse-phase high-performance liquid chromatography (RP-HPLC) was conducted on a Waters 2695 Separations Module with a Capcell Pak C18 column (4.6 mm x 250 mm, 5 μm, Shiseido). The mobile phase consisted of 0.05% TFA in H<sub>2</sub>O (mobile phase A) and 0.05% TFA in acetonitrile (mobile phase B). Elution was achieved by employing a linear gradient for mobile phase B of 5% to 65% over 30 min at a flow rate of 1.0 mL/min. The peptide peaks were detected at a wavelength of 230 nm.

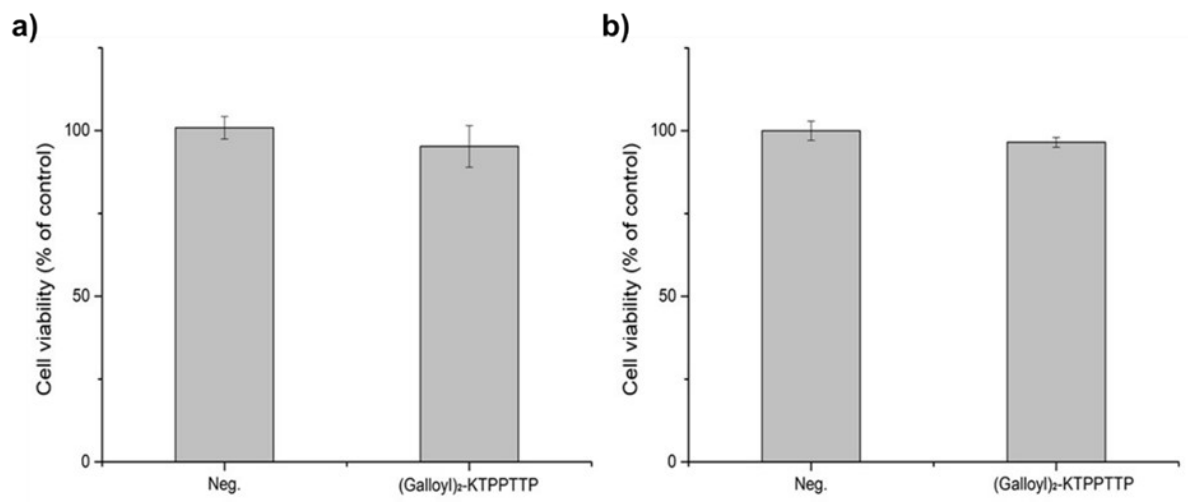

Figure S2. Evaluation of cell viability for final purified peptide sample using MTT assay: a) HaCaT, b) CCD-1064sk.

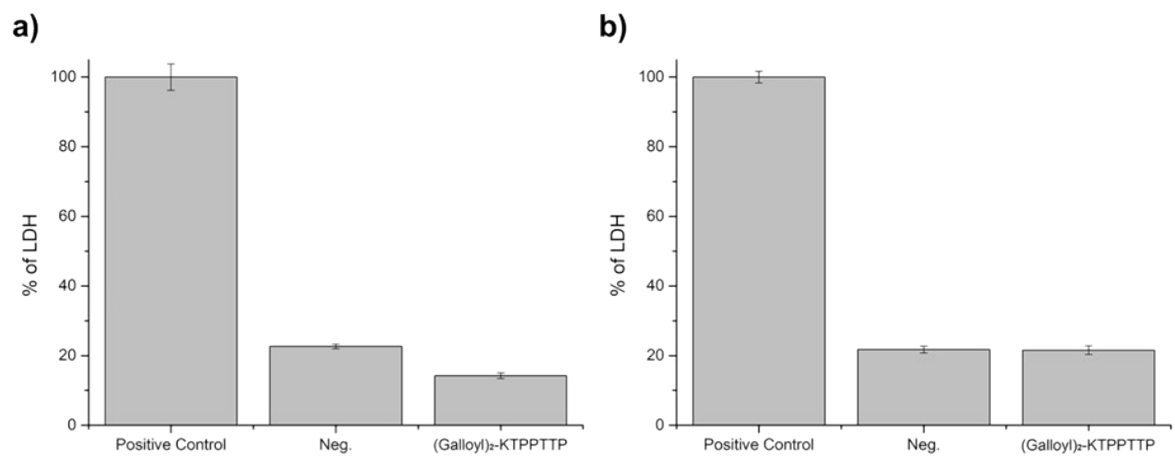

Figure S3. Evaluation of cell viability for final purified peptide sample using LDH assay: a) HaCaT, b) CCD-1064sk.

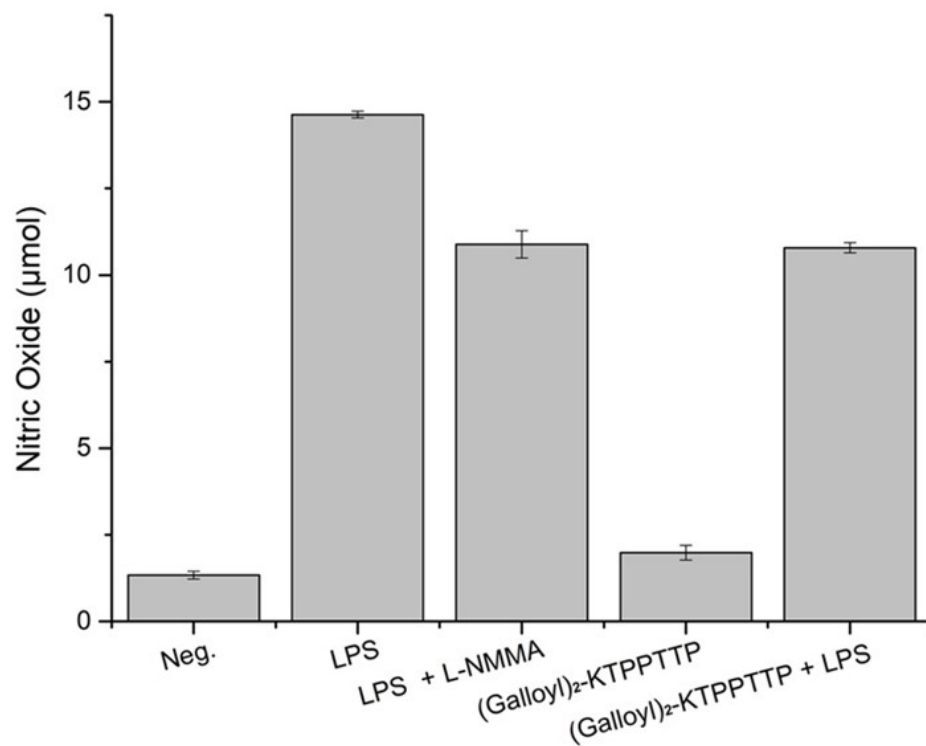

Figure S4. Inflammation evaluation on RAW 264.7 cells of the final purified peptide using Griess reagent. LPS (lipopolysaccharide) as an inflammation inducer and L-NMMA as a NOS inhibitor.
